# Supplementary material for: Effects of tillage and biochar on soil physiochemical and microbial properties and its linkage with crop yield
Source: Front Microbiol. 2022 Sep 20;13:929725. doi: 10.3389/fmicb.2022.929725 (PMC9530144; doi:10.3389/fmicb.2022.929725)
Supplement: Supplementary file 1 [file Table_1.XLSX]

## Sheet: Sheet1
Season	Tillage	Treatment	pH			AP (mg kg-1)			AK (mg kg-1)			SOC (g kg-1)			TN (g kg-1)
			0-10cm	10-20cm	20-30cm	0-10cm	10-20cm	20-30cm	0-10cm	10-20cm	20-30cm	0-10cm	10-20cm	20-30cm	0-10cm	10-20cm	20-30cm
The mature stage of wheat in 2019	R	CK	6.04±0.16a	6.82±0.34a	7.27±0.33a	20.94±0.1c	11.64±0.53d	6.08±0.86c	173.33±2.89b	116.67±7.64a	113.33±10.41a	11.69±0.31d	8.99±0.28d	8.25±0.1c	1.17±0.04c	0.85±0.08c	0.8±0.04b
		NPK	5.37±0.07b	6.26±0.49ab	7.01±0.15a	24.63±0.6ab	17.73±1.86c	8.65±0.61b	188.33±12.58ab	123.33±16.07a	108.33±2.89a	13.07±0.31a	10.63±0.26b	8.23±0.24c	1.32±0.02ab	1.08±0.03b	0.85±0.04b
		NPKB	5.75±0.25ab	5.99±0.17bc	7±0.13a	25.08±0.12a	25.19±1.56a	8.05±1.17b	206.67±17.56a	141.67±2.89a	115±10a	12.61±0.33ab	11.68±0.42a	8.44±0.07bc	1.36±0.07a	1.22±0.09a	0.85±0.05b
	D	CK	5.77±0.23ab	6.42±0.23ab	7.19±0.04a	18.98±1.59d	10.73±0.16d	10.54±0.56a	171.67±7.64b	120±13.23a	111.67±16.07a	12.04±0.2cd	10±0.2c	8.29±0.38c	1.19±0.08bc	0.98±0.06b	0.94±0.04a
		NPK	5.41±0.1b	5.6±0.5c	7.31±0.27a	23.35±0.08b	22.08±1.3b	11.93±0.84a	180±26.46ab	116.67±20.21a	120±18.03a	12.1±0.04bcd	10.67±0.08b	8.84±0.17ab	1.3±0.1abc	1.06±0.01b	0.99±0.04a
		NPKB	5.47±0.42b	5.9±0.1bc	7.36±0.17a	23.74±0.52ab	26.04±1.59a	11.06±0.66a	175±15b	121.67±17.56a	123.33±7.64a	12.26±0.32bc	11.5±0.36a	9.21±0.44a	1.24±0.09abc	1.07±0.01b	0.97±0.03a
The mature stage of maize in 2019	R	CK	6.3±0.17a	7.03±0.29a	7.41±0.19a	18.96±0.79d	8.9±1.3c	3.26±0.17c	188±3d	184.33±3.21c	164.13±9.67b	13.06±0.2c	7.76±0.45d	7.41±0.4b	1.1±0.08b	0.95±0.08c	0.83±0.08c
		NPK	5.35±0.29b	6.21±0.28c	7.19±0.55a	25.13±0.61b	25.86±0.15a	5.63±0.52b	247.83±2.25b	243.33±13.32ab	166.13±5.86ab	13.96±0.29b	8.26±0.37cd	7.76±0.82ab	1.26±0.04ab	1.18±0.01a	0.89±0.04bc
		NPKB	5.45±0.4b	6.4±0.15c	6.94±0.25a	27.61±0.35a	25.77±1.76a	5.41±0.38b	273±12.32a	256.33±13.05a	169±1.4ab	15.14±0.42a	11.33±0.39a	8.56±0.73a	1.28±0.07a	1.19±0.04a	0.88±0.01bc
	D	CK	6.19±0.14a	6.95±0.38ab	7.39±0.17a	18.92±0.8d	10.42±0.36c	3.89±0.76c	192.5±8d	182.67±16.07c	174.93±7.74ab	13.11±0.03c	8.94±0.25c	7.6±0.35ab	1.16±0.17ab	1.02±0.17bc	0.83±0.03c
		NPK	5.12±0.13b	5.91±0.22c	7.16±0.17a	23.15±1.04c	24.85±0.78ab	11.64±0.64a	234.83±5.51bc	248.33±14.47ab	171.47±12.27ab	13.81±0.22b	10.29±0.56b	8.06±0.34ab	1.22±0.02ab	1.11±0.03ab	0.93±0ab
		NPKB	5.18±0.09b	6.46±0.39bc	7.03±0.37a	24.58±1.08bc	23.4±1.21b	11.24±0.66a	229.33±17.21c	231.33±5.86b	181.47±10.88a	13.76±0.42b	10.82±0.27ab	7.95±0.41ab	1.22±0.03ab	1.13±0.02ab	0.98±0.02a
The mature stage of wheat in 2020	R	CK	6.08±0.1a	6.76±0.23a	7.37±0.17a	50.78±0.28b	14.63±0.11b	1.59±0.1b	161.17±1.89b	113.17±1.04b	143.17±4.54b	11.33±0.02d	6.32±0.02c	3.97±0.08d	0.97±0.06b	0.63±0.03c	0.54±0.01b
		NPK	5.68±0.35ab	6.08±0.09c	7.01±0.27ab	64.76±7.34ab	43.23±17.17a	2.43±1.02ab	172.67±22.12b	119.83±15.89ab	224±9.99a	11.55±0.31cd	11.48±0.19a	5.95±0.77bc	1.13±0.08a	1.09±0.07a	0.57±0.01b
		NPKB	5.8±0.05ab	6.16±0.31bc	7.31±0.08ab	66.48±16.68a	25.29±15.61ab	3.76±2.2ab	172.33±20.6b	128.83±2.93ab	222.83±11.9a	13.64±0.18a	8.36±0.07b	5.59±0.17c	1.1±0.12a	1.2±0.12a	0.57±0.03b
	D	CK	5.9±0.09ab	6.38±0.21abc	7.16±0.02ab	56.08±0.4ab	15.95±0.07b	1.88±0.04ab	171.17±2.75b	148±5.57ab	157.5±5.07b	11.41±0.01cd	6.42±0.03c	5.14±0.06c	1.02±0.03ab	0.64±0.01c	0.56±0b
		NPK	5.49±0.03b	6.44±0.13abc	7.22±0.36ab	65.67±4.36ab	17.42±9.72b	2.28±1.71ab	212.17±21.87a	164±74.95ab	227.5±9.64a	11.92±0.34c	6.69±1.28bc	6.8±0.53b	1.15±0.05a	0.68±0.11bc	0.58±0.08b
		NPKB	5.89±0.4ab	6.67±0.49ab	6.95±0.12b	60.85±1.68ab	27.84±6.69ab	5.16±2.95a	183.83±31.58ab	185.67±61.53a	236.17±24.34a	12.53±0.55b	12.77±2.19a	8.33±1.46a	1.05±0.06ab	0.84±0.19b	0.86±0.07a
The filling stage of maize in 2020	R	CK	5.96±0.19a	6±0.19a	6.65±0.11a	15.16±4.11b	8.79±0.63d	3.82±0.02c
		NPK	5.17±0.21b	5.83±0.28ab	6.36±0.11b	28.08±2.91a	22.72±0.86a	9.2±1.89b
		NPKB	5.3±0.06b	5.83±0.07ab	6.29±0.14b	30.59±4.41a	12.82±0.22c	8.92±2.52b
	D	NPK	5.38±0.16b	5.55±0.14b	6.3±0.05b	20.55±4.59b	17.09±3.79b	8.14±0.79b
		NPKB	5.45±0.08b	5.71±0.07ab	6.12±0.21b	17.73±3.23b	23.04±0.63a	18.84±1.54a
The mature stage of maize in 2020	R	CK	6.06±0.07a	6.26±0.04ab	7.21±0.45a	33.96±2.34c	14.06±0.9d	3.3±0.17c	197.67±7.77ab	183.67±42.25a	168.67±18.01a	9.07±1.79a	11.39±0.72b	8.02±0.56a	0.88±0.1c	0.7±0.06b	0.5±0.04b
		NPK	5.21±0.31c	6.09±0.28b	7.29±0.03a	53.59±1.73a	15.99±1.5c	4.04±0.9bc	169±15.39b	159.67±18.56a	158.33±56.77a	9.29±2.13a	12.09±0.26ab	6.64±0.57a	1.23±0.06a	0.71±0.23b	0.53±0.06ab
		NPKB	5.47±0.27bc	6.52±0.16a	7.15±0.16a	49.87±3.51a	31.48±0a	5.29±0ab	196±23.58ab	175±9.64a	194.33±39.02a	8.14±1.49a	13.78±1.72a	8.13±2.06a	1.13±0.2ab	0.76±0.01ab	0.55±0.01ab
	D	NPK	5.58±0.44abc	5.95±0.26b	7.13±0.38a	47.73±5.56ab	24.78±0.15b	5.03±0.14ab	180.33±21.08b	195.33±11.02a	199±21.63a	8.45±1.15a	12.38±1.13ab	7.83±0.54a	0.94±0.11bc	0.87±0.08ab	0.58±0.03a
		NPKB	5.77±0.16ab	6.02±0.13b	6.95±0.57a	42.1±2.82b	31.35±1.54a	5.73±1.14a	221±28.58a	194.67±13.28a	201.33±3.79a	10.73±1.11a	14.16±1.42a	8.39±1.08a	1.06±0.07abc	0.98±0.09a	0.57±0.06ab
S			3.438*	16.037***	28.326***	297.363***	6.701***	105.92***	31.204***	71.444***	72.239***	89.737***	75.94***	62.537***	28.739***	40.139***	352.565***
T			0.042	8.898**	0.701	12.053**	0.025	87.357***	0.204	6.474*	6.769*	0.023	4.323*	20.302***	5.229*	0.685	62.413***
F			55.366***	17.648***	3.201*	37.588***	42.845***	62.053***	11.721***	6.364**	12.837***	7.655**	77.021***	15.768***	19.695***	29.179***	29.569***
S×T			3.036*	3.235*	1.628	2.485	3.82**	10.364***	6.345**	6.099**	0.522	2.781	1.368	5.911**	2.242	20.631***	6.954**
S×F			2.956**	3.281**	0.752	2.193*	3.003**	10.526***	6.754***	3.428**	7.643***	2.183	3.278**	5.456***	0.937	4.79**	4.745**
T×F			0.128	2.339	1.168	1.78	4.02*	9.548***	2.289	0.438	0.118	1.681	8.079**	0.42	1.692	11.857***	8.384**
S×T×F			0.615	1.89	0.717	0.553	5.996***	11.727***	1.547	0.511	0.624	3.845	21.593***	2.648*	1.315	1.47	7.243***
